# Supplementary material for: Cognitive Development Masks Support for Attributional Style Models of Depression in Children and Adolescents
Source: Springer Nature journal article supplement (doi:10.1007/s10802-012-9617-8), 2012-03-16

Peabody Causal Reasoning Test (PCRT)

Directions:

Read the following questions carefully. After reading the question, choose ONE answer that you think is correct.


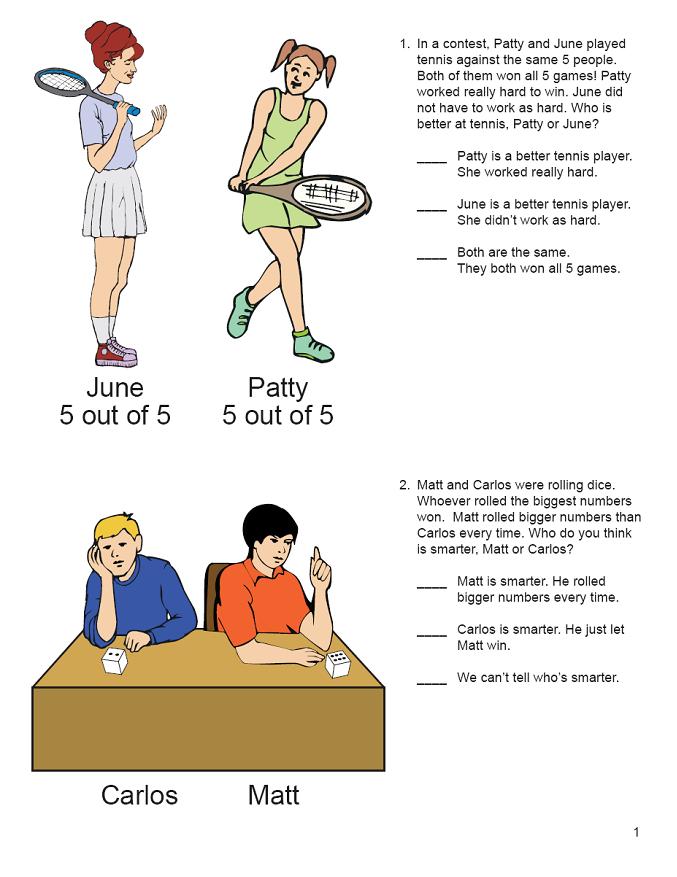

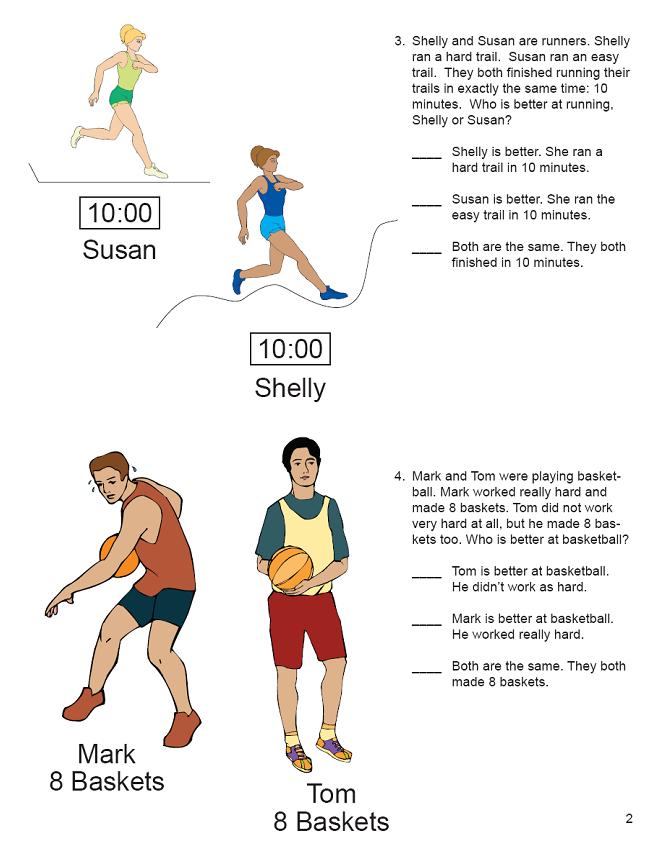

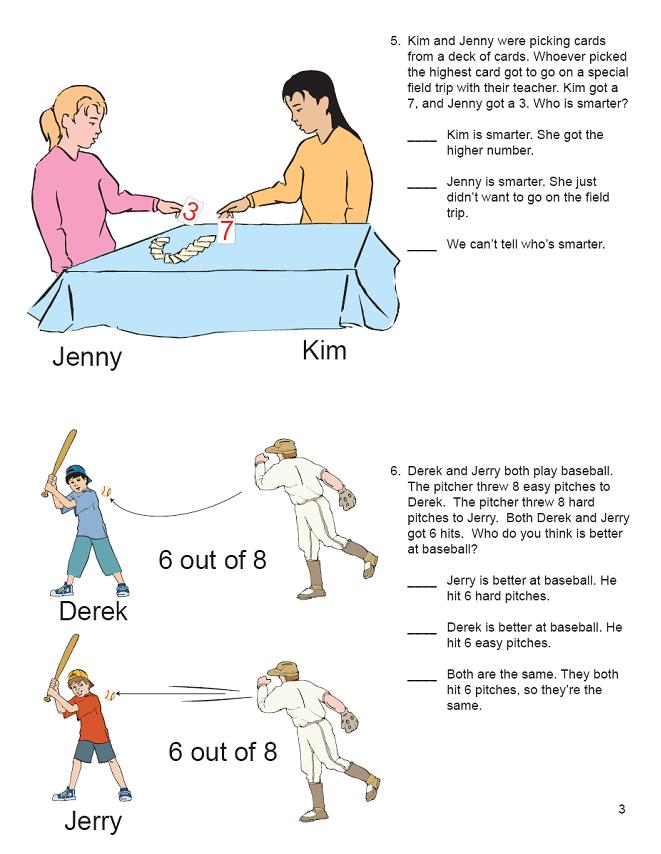

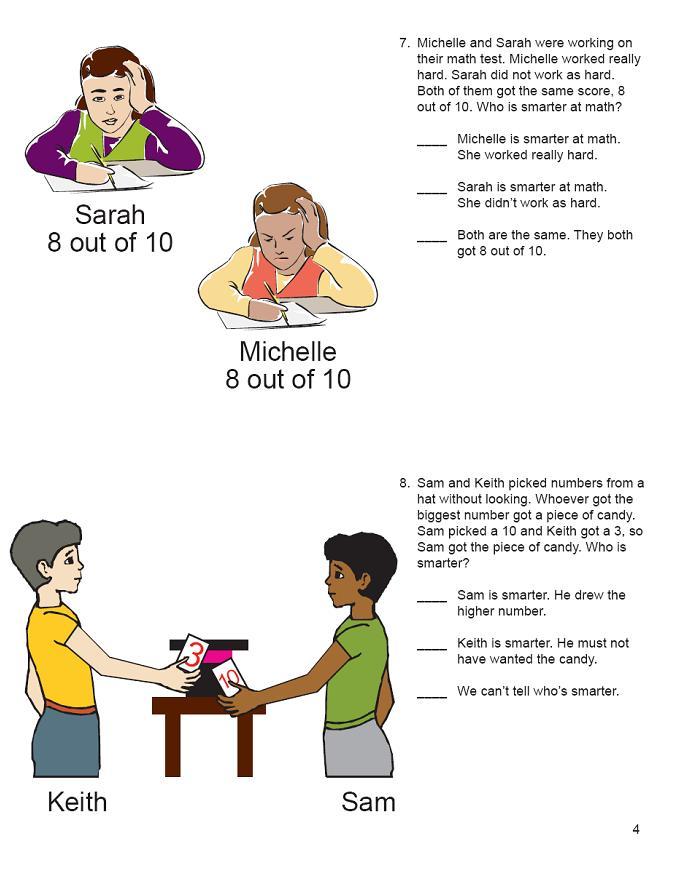

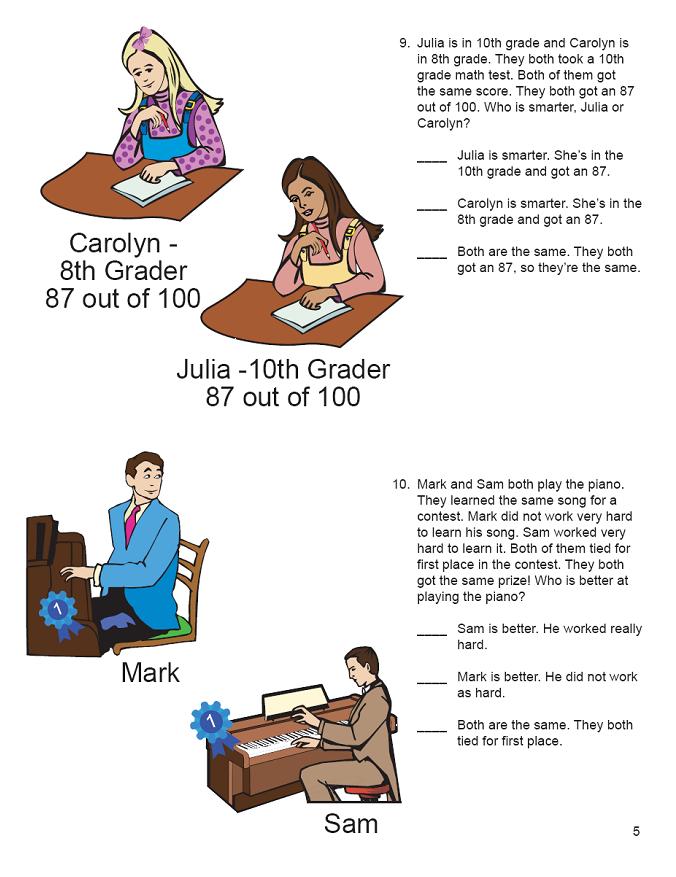

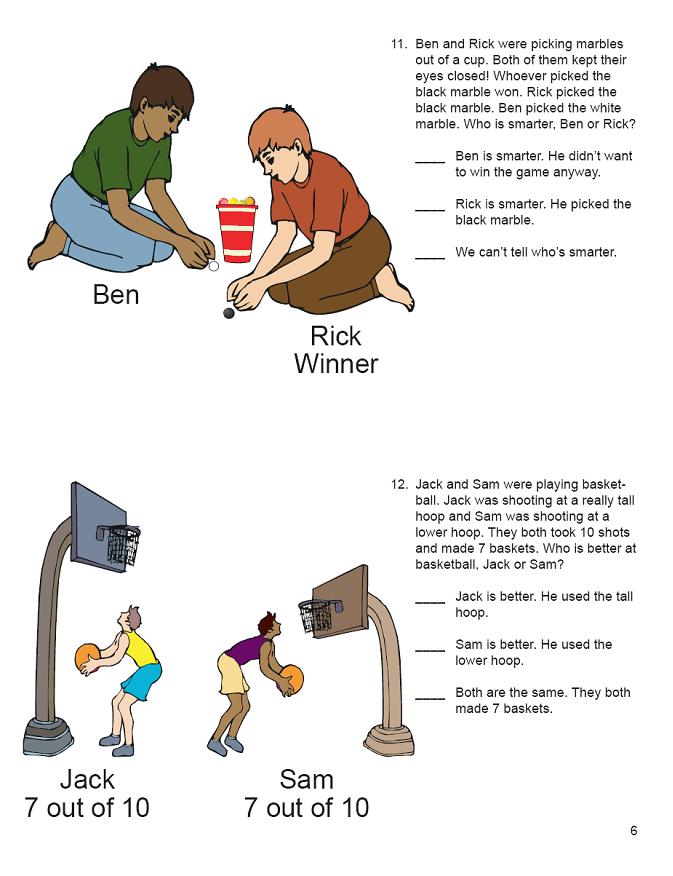

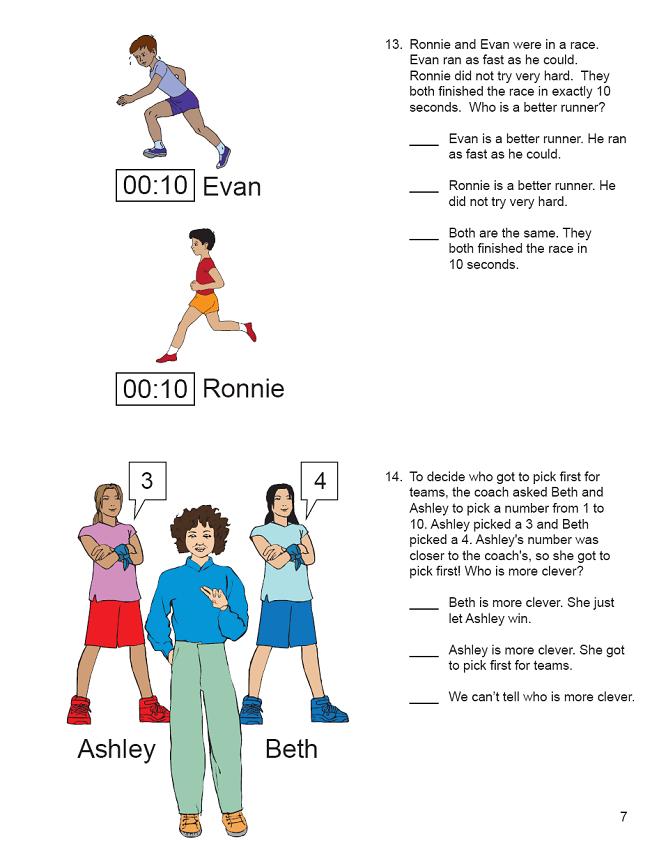

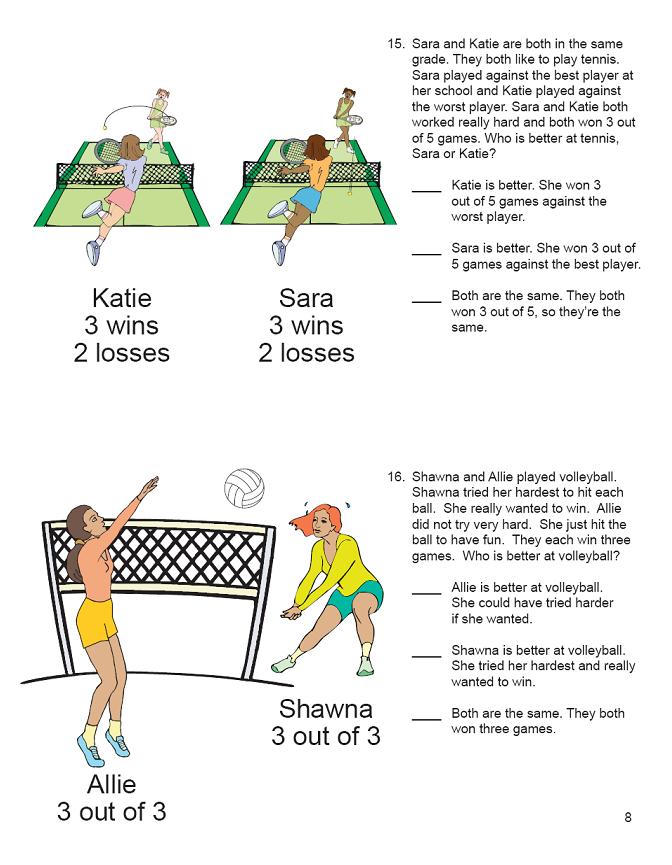

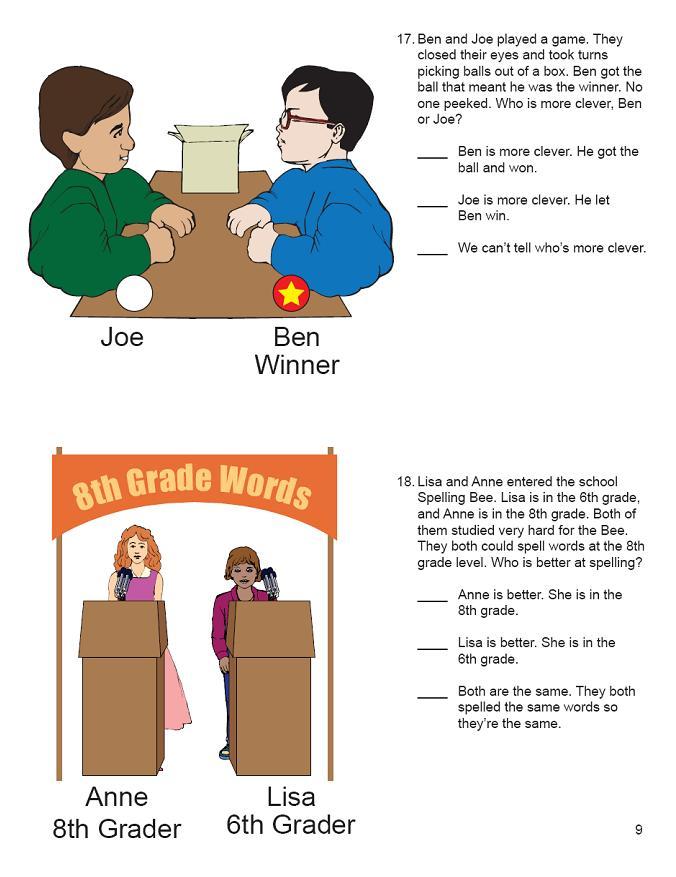

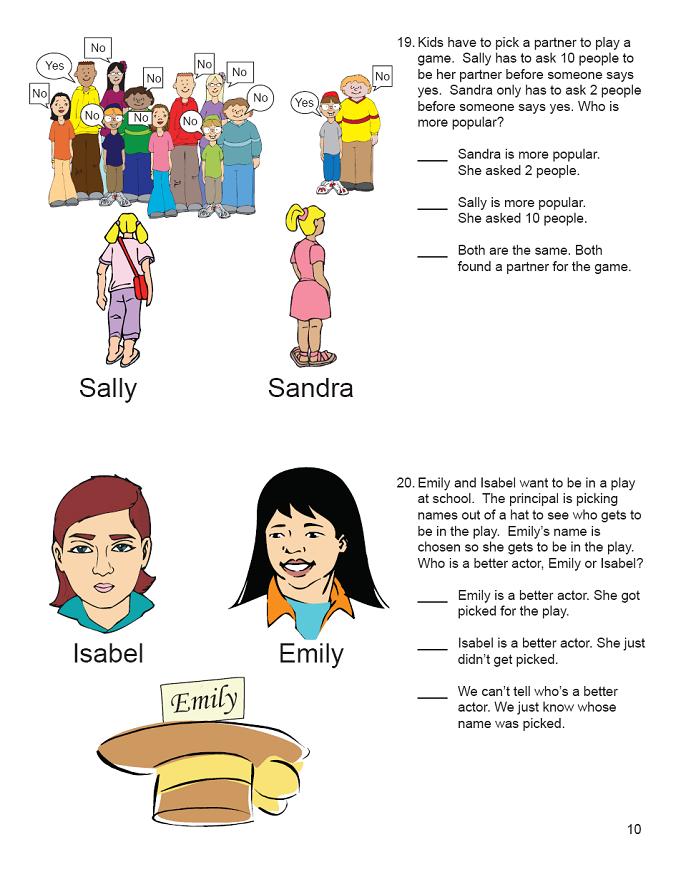

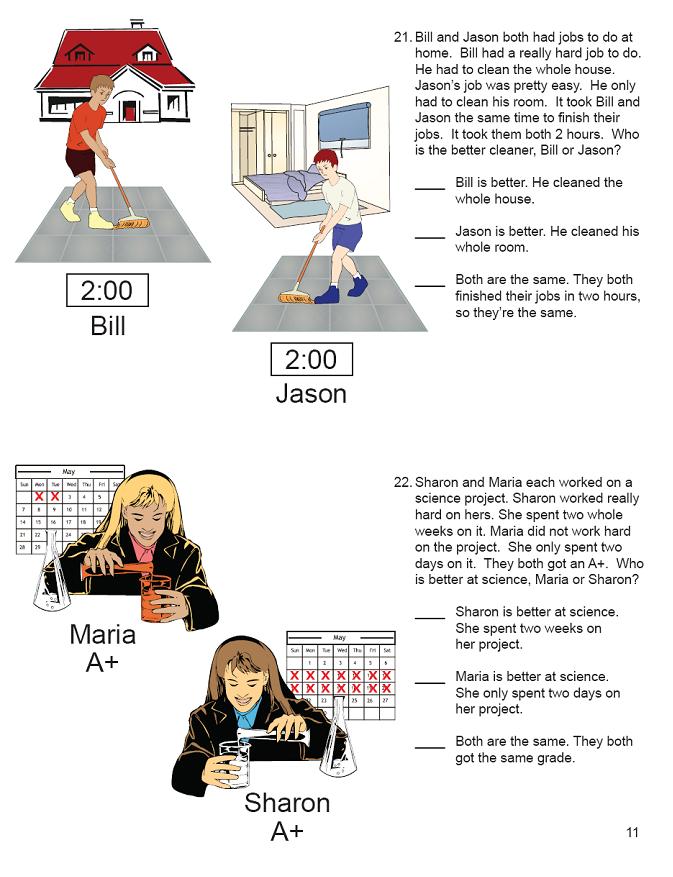

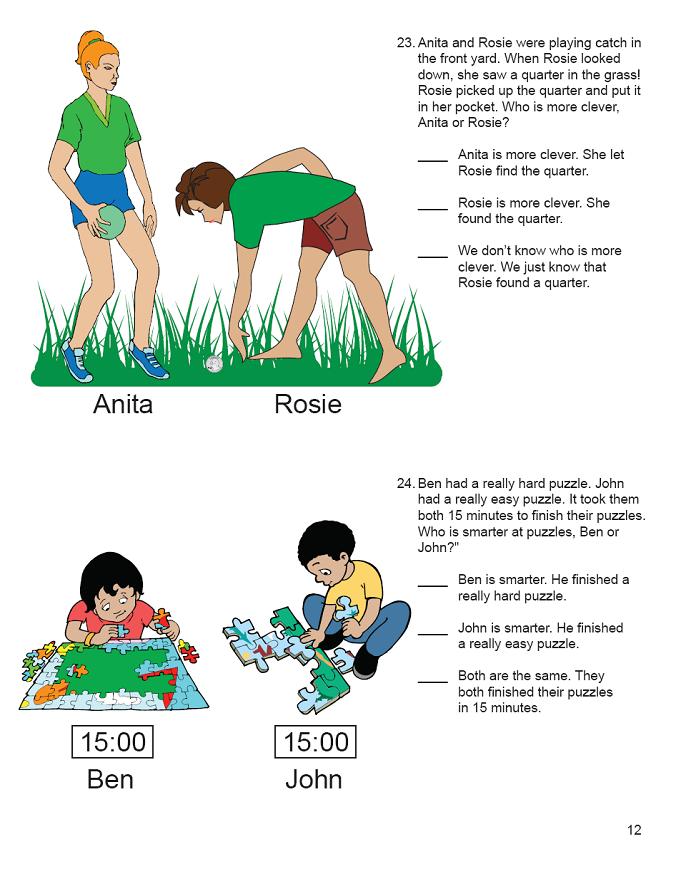

Supplement: MOESM1 [file 540572]
